# Supplementary material for: DSC and universal bit-level combining for HARQ systems
Source: Springer Nature journal article supplement (doi:10.1186/1687-1499-2011-66), 2011-08-18
Supplement: 13638_2011_69_MOESM4_ESM.pdf [file 13638_2011_69_MOESM4_ESM.pdf]

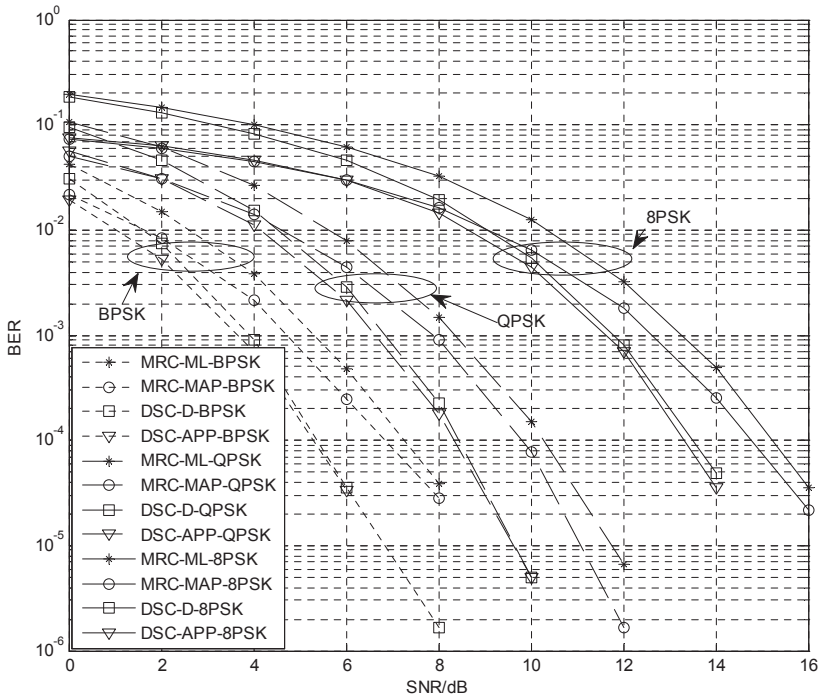

(a) Performance of DSC-APP in diverse BPSK, QPSK, and 8PSK modulation schemes.

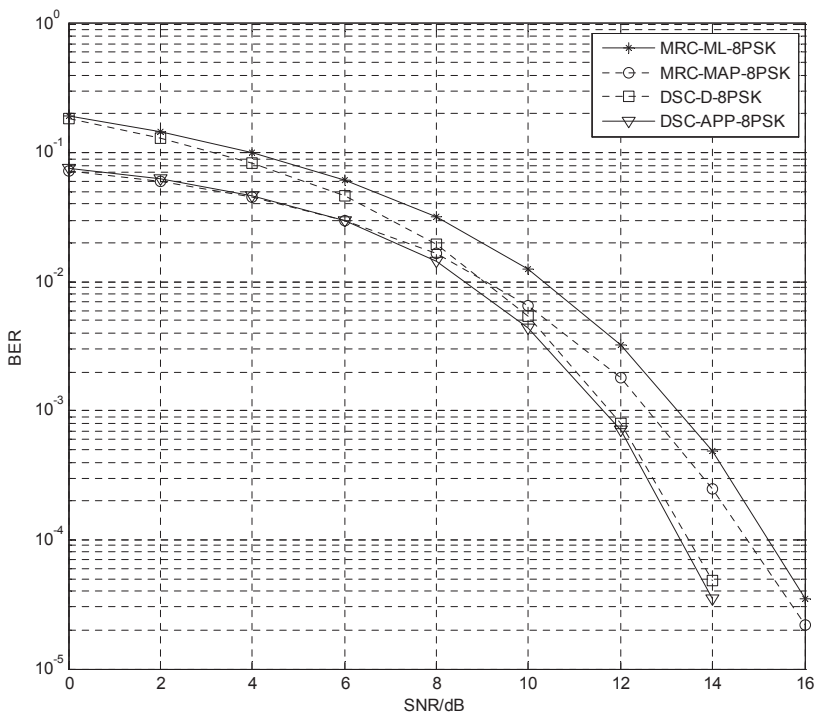

(b) Performance of DSC-APP in 8PSK modulation scheme.
