# Supplementary material for: DSC and universal bit-level combining for HARQ systems
Source: Springer Nature journal article supplement (doi:10.1186/1687-1499-2011-66), 2011-08-18

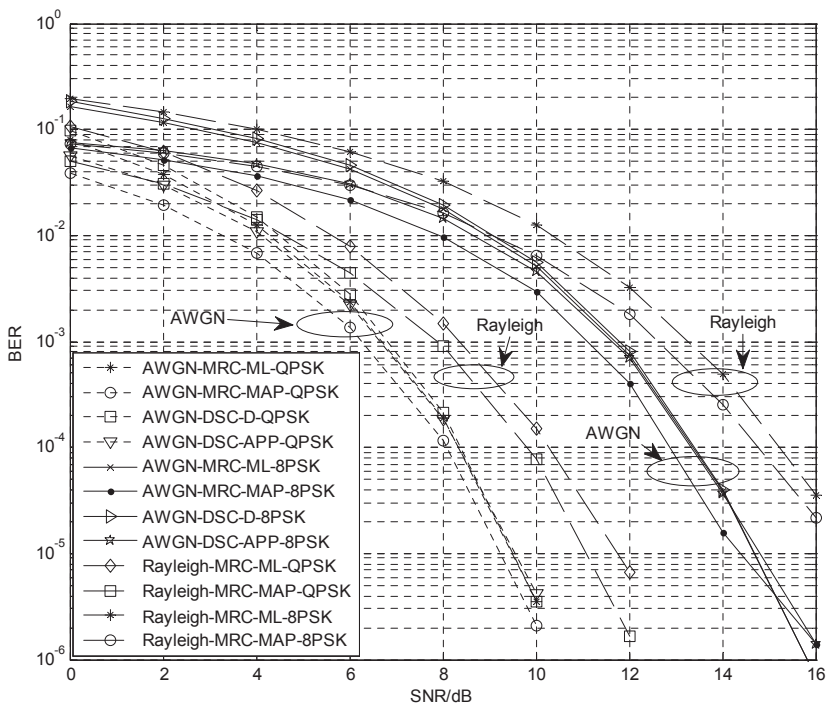

Supplement: 13638_2011_69_MOESM7_ESM.pdf [file 13638_2011_69_MOESM7_ESM.pdf]
